# Supplementary material for: Local relapse of nasopharyngeal cancer and Voxel-based analysis of FMISO uptake using PET with semiconductor detectors
Source: Radiat Oncol. 2017 Sep 6;12:148. doi: 10.1186/s13014-017-0886-9 (PMC5586018; doi:10.1186/s13014-017-0886-9)
Supplement: Supplementary file 2 — The dose constraints to organs at risk (OARs). Abbreviations: OAR organ at risk, PRV planning organ at risk volume, D XX% the maximum dose covering the target volume of XX%, D 1cc the maximum dose covering the target volume of 1 cm3, V XXGy the percent of the target volume receiving XXGy, D max maximum dose, D mean mean dose, D median median dose. (DOCX 47 kb) [file 13014_2017_886_MOESM2_ESM.docx]

Table S2 The dose constraints to organs at risk (OARs)

| **Organ** | **Dose Constraint** |
| --- | --- |
| Spinal Cord_PRV | Dmax < 50 Gy |
| D1cc < 46 Gy |
| Spinal Cord | D1cc < 46 Gy |
| Brain_PRV | Dmax < 70 Gy |
| Brain - 5 mm | Dmax < 60 Gy |
| Brain Stem_PRV | Dmax < 54 Gy |
| Brain Stem | Dmax < 54 Gy |
| Optic Nerve_PRV | Dmax < 50 Gy |
| Eye | Dmax < 40 Gy |
| Lens | Dmean < 6 Gy |
| Parotid | Dmedian < 20 Gy |
| Dmean < 26 Gy |
| Constrictor Muscles | Dmean < 54 Gy |
| Larynx | Dmean < 45 Gy |
| Inner Ear_PRV | Dmean < 45 Gy |
| Mandible | V65Gy (as low as possible) |
| V70 Gy (as low as possible) |
| V75Gy < 1cc |
| Oral | Dmean < 45 Gy |
| V60Gy (as low as possible) |
| Esophagus | V45Gy (as low as possible) |
| Lung | V20Gy (as low as possible) |
